# Supplementary material for: Sinapic Acid Reduces Oxidative Stress and Pyroptosis via Inhibition of BRD4 in Alcoholic Liver Disease
Source: PubMed Central journal article supplement (PMC8212038; doi:10.3389/fphar.2021.668708), 2021-06-04
Supplement: Image1.pdf [file Image1.pdf]

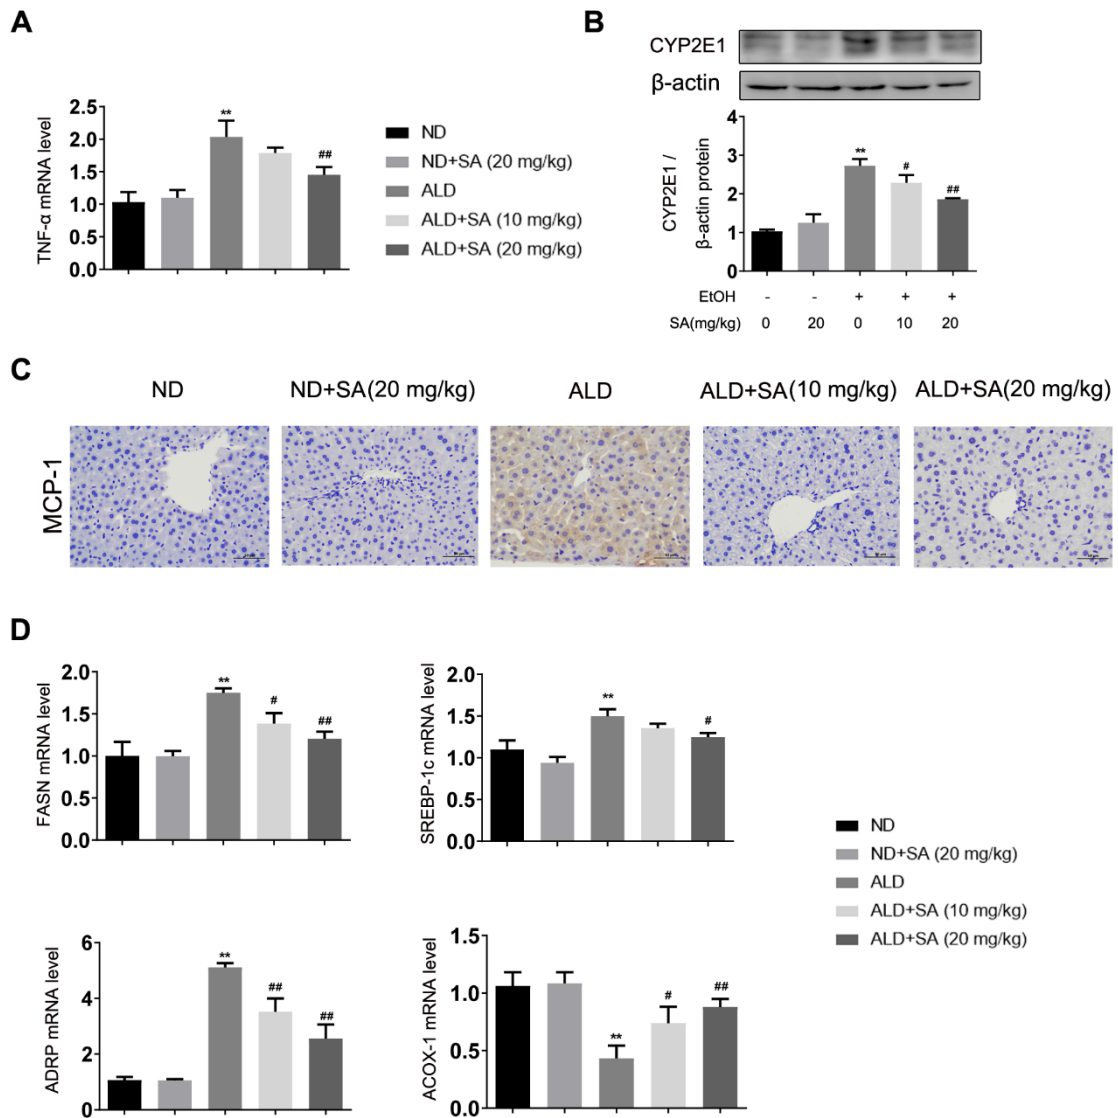

**FIGURE S1.** SA diminishes alcohol-induced liver injury in mice. **(A)** The mRNA levels of TNF- $\alpha$  in mouse livers (n = 6). **(B)** Western blotting of CYP2E1 levels (n = 3). **(C)** IHC staining for MCP-1 ( $\times 400$ ). Scale bar = 50  $\mu$ m. **(D)** The mRNA levels of FASN, SREBP-1c, ADRP and ACOX-1 in mouse livers (n = 6). \*\* $P < 0.01$  vs the ND group; # $P < 0.05$ , ## $P < 0.01$  vs the ALD group.

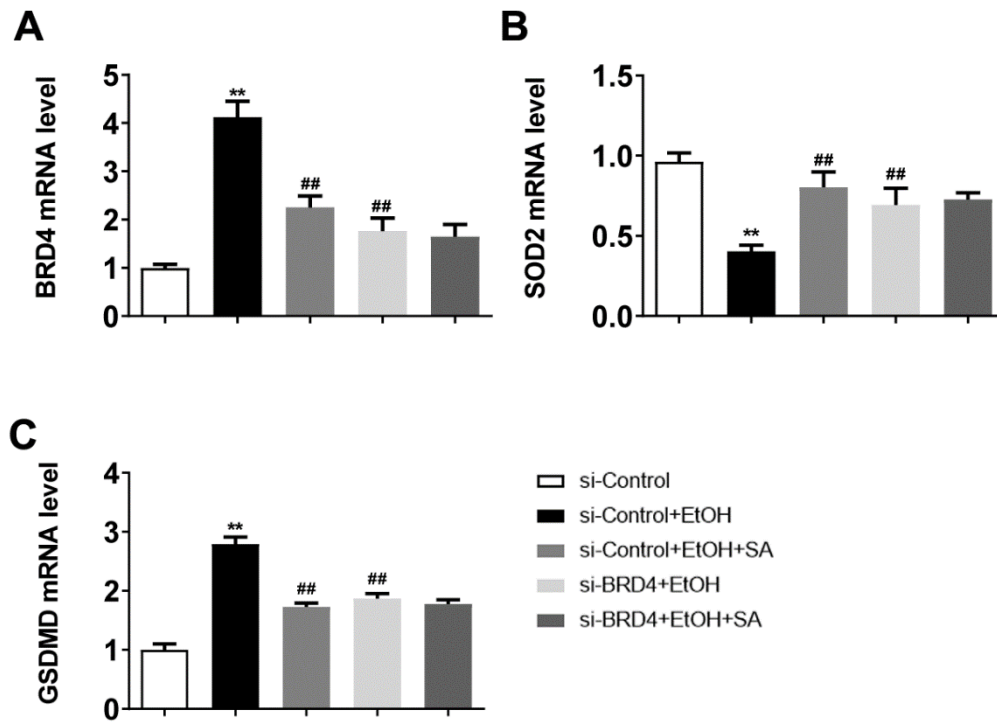

**FIGURE S2.** SA ameliorates oxidative stress and pyroptosis in EtOH-treated HepG2 cells.

(A) The mRNA levels of BRD4 (n = 6). (B) The mRNA levels of SOD2 (n = 6). (C) The mRNA levels of GSDMD (n = 6). \*\* $P < 0.01$  vs the control group; ## $P < 0.01$  vs the EtOH group.

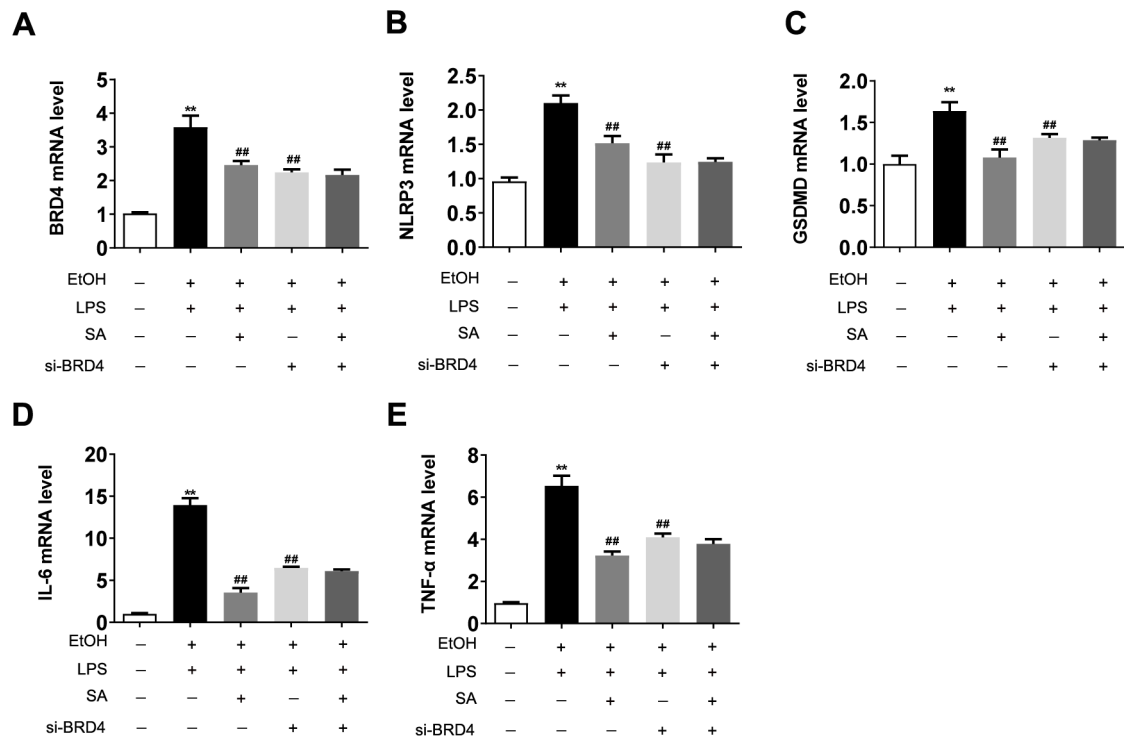

**FIGURE S3.** SA ameliorates pyroptosis and inflammation in Raw 264.7 cells by regulating BRD4. **(A)** The mRNA levels of BRD4 (n = 6). **(B)** The mRNA levels of NLRP3 (n = 6). **(C)** The mRNA levels of GSDMD (n = 6). **(D)** The mRNA levels of IL-6 (n = 6). **(E)** The mRNA levels of TNF- $\alpha$  (n = 6). \*\* $P < 0.01$  vs the control group; ### $P < 0.01$  vs the EtOH + LPS group.
